# Supplementary material for: Stable and reversible doping of graphene by using KNO3 solution and photo-desorption current response
Source: Royal Society of Chemistry journal article supplement (doi:10.1039/c5ra08136j), 2015-01-01
Supplement: c5ra08136j1.pdf [file c5ra08136j1.pdf]

## Supplementary Information

### **Stable and reversible doping of graphene by using $\text{KNO}_3$ solution and photo-desorption current response**

M. Farooq Khan, M. Zahir Iqbal, M. Waqas Iqbal, Vladimir M. Iermolenko, H. M. Waseem

Khalil, Jungtae Nam, Keun Soo Kim, Hwayong Noh and Jonghwa Eom\*

Department of Physics and Graphene Research Institute, Sejong University, Seoul 143-747, Korea.

\*E-mail: eom@sejong.ac.kr

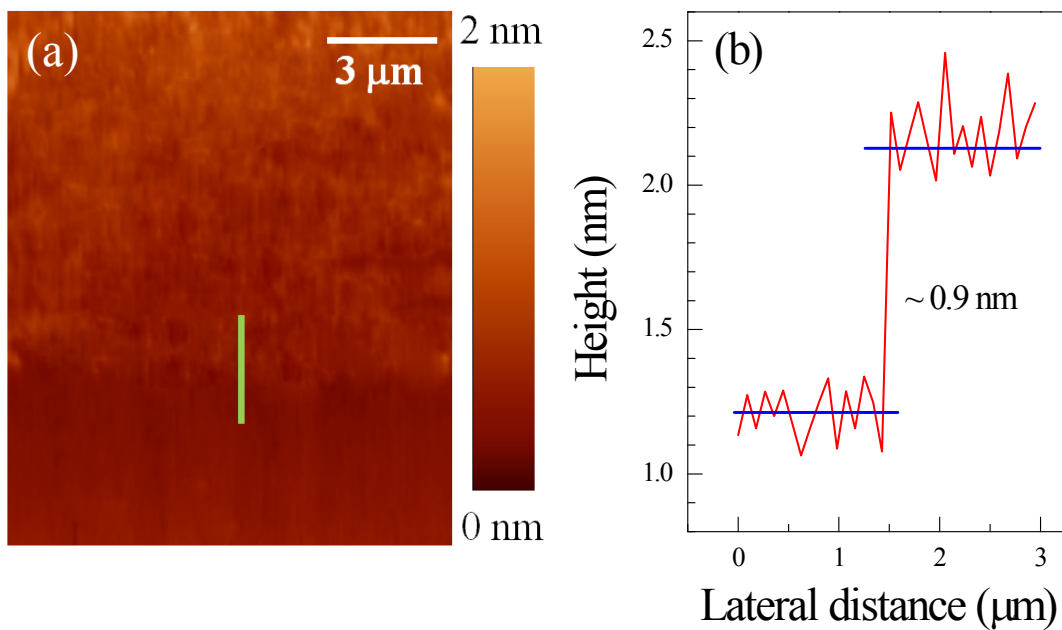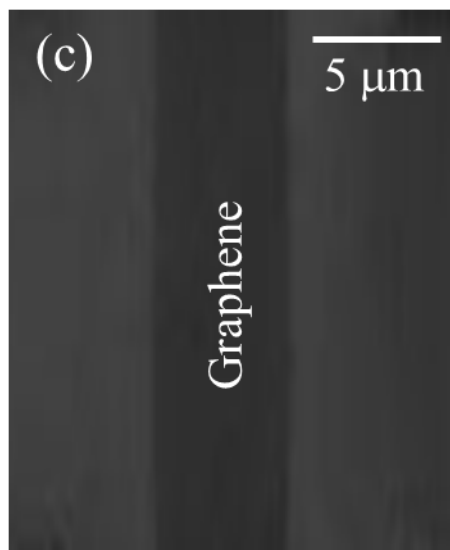

**Figure S1.** (a) The atomic force microscopic image of pristine CVD-grown graphene. (b) The thickness profile along the green line in (a). (c) SEM image of CVD-grown graphene channel in the device.

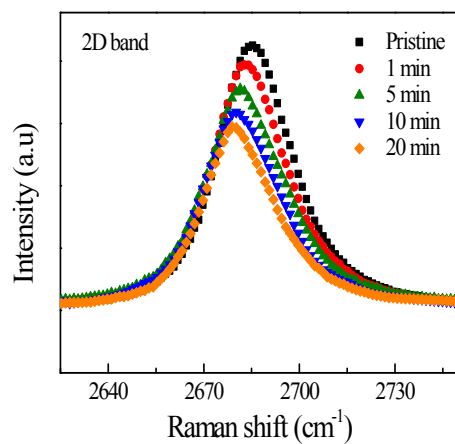

**Figure S2.** Zoom-in spectra of 2D band of pristine and doped graphene (Device-1) for different time.

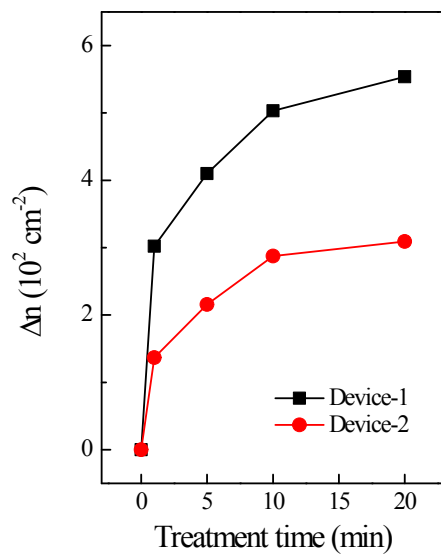

**Figure S3.** Change of charge carrier density ( $\Delta n$ ) as a function of treatment time for CVD-grown graphene (Device-1 & Device-2).

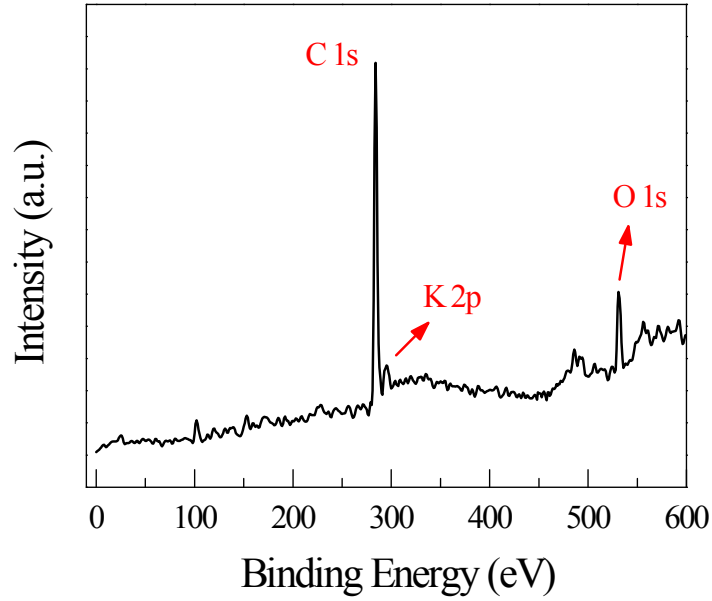

**Figure S4.** XPS spectra of CVD-grown graphene doped by  $\text{KNO}_3$  solution for 20 min..

| Device-4                                      | Pristine | Doped (20 min) | After 2 months | Annealed |
|-----------------------------------------------|----------|----------------|----------------|----------|
| Electron mobility ( $\text{cm}^2/\text{Vs}$ ) | 1304     | 2950           | 2782           | 896      |
| Hole mobility ( $\text{cm}^2/\text{Vs}$ )     | 1451     | 3024           | 2827           | 1303     |

**Table 1.** The electron and hole mobilities of pristine, doped, after 2 month and annealed CVD-grown graphene (Device-4).
